# Supplementary material for: Chemosensitizing activity of peptide from Lentinus squarrosulus (Mont.) on cisplatin-induced apoptosis in human lung cancer cells
Source: PubMed Central journal article supplement (PMC7892851; doi:10.1038/s41598-021-83606-1), 2021-02-18

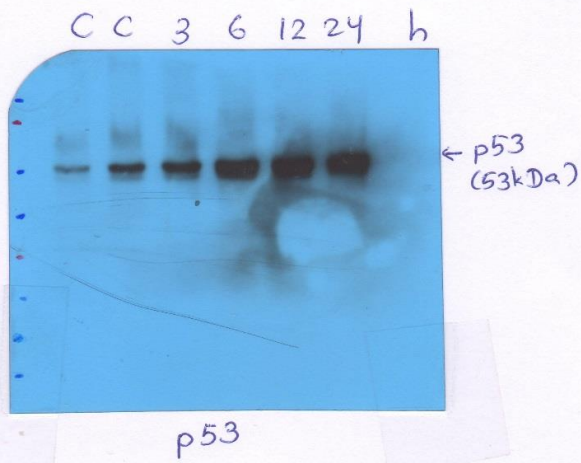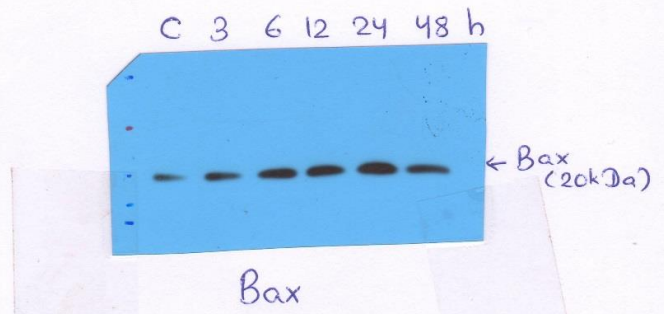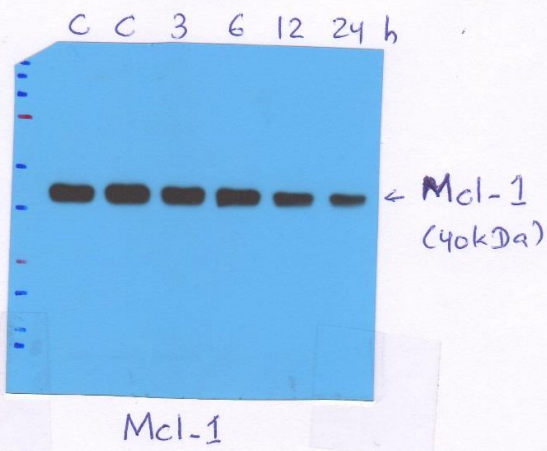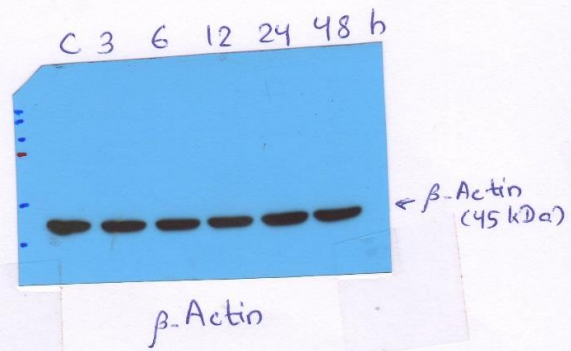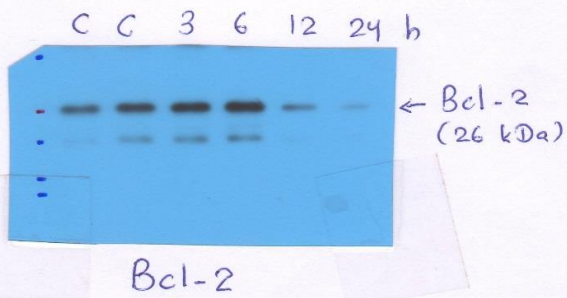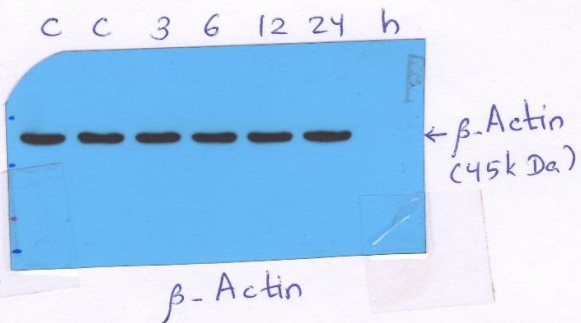

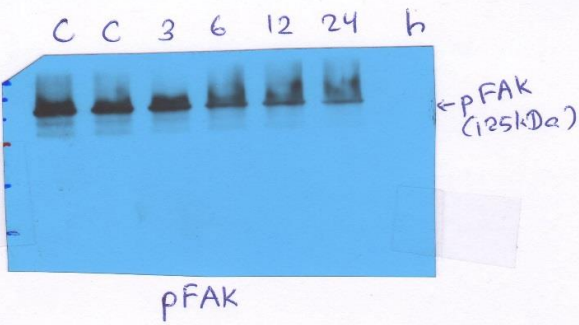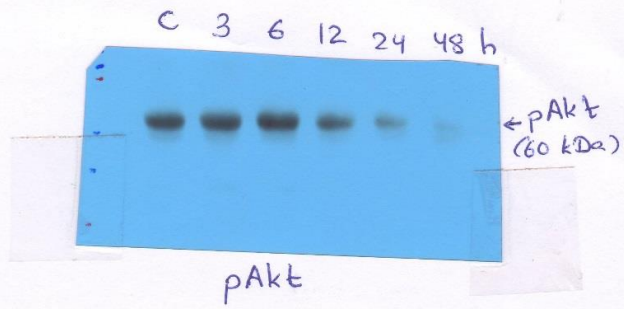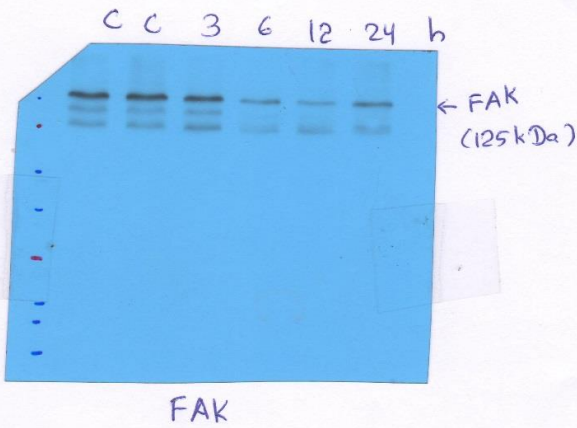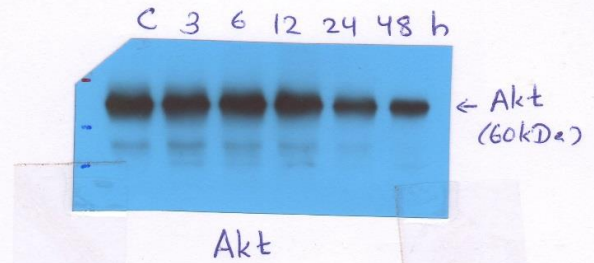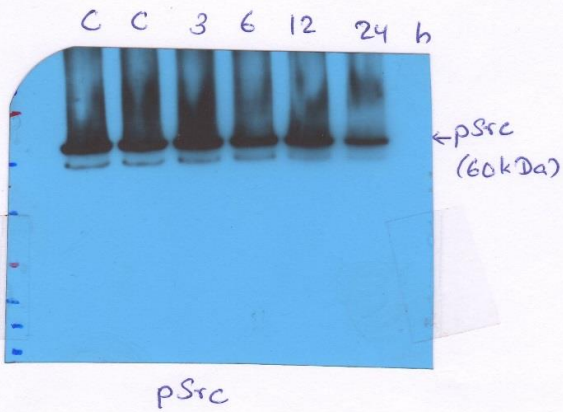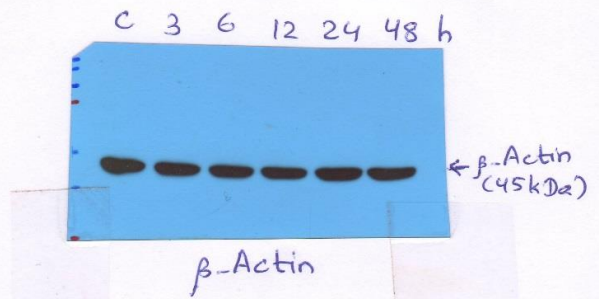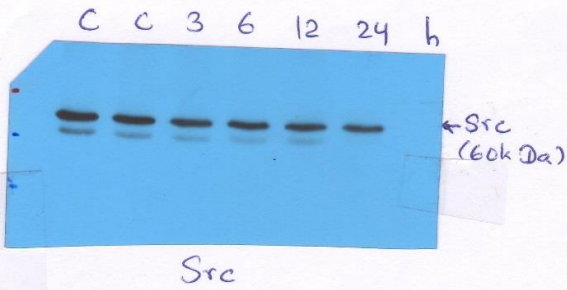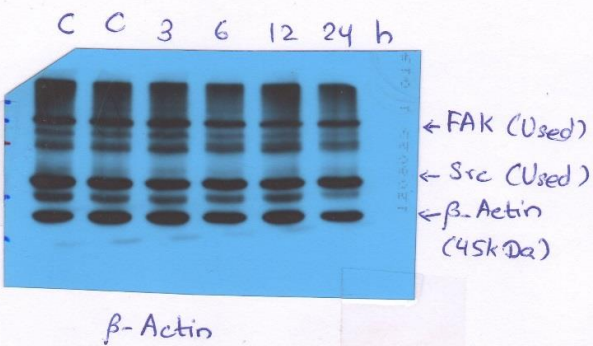

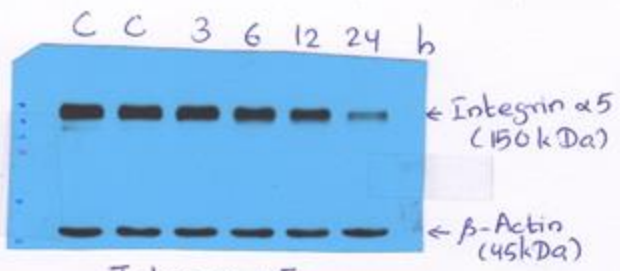

Integrin  $\alpha 5$

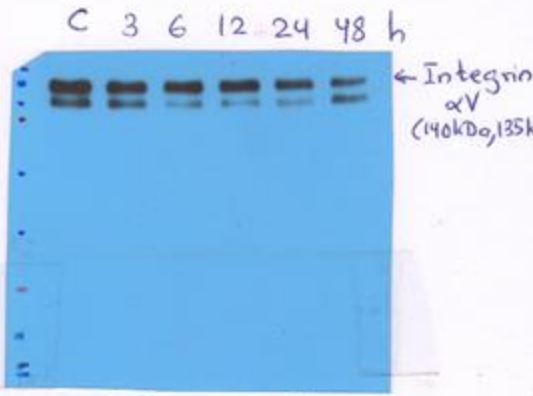

Integrin  $\alpha V$

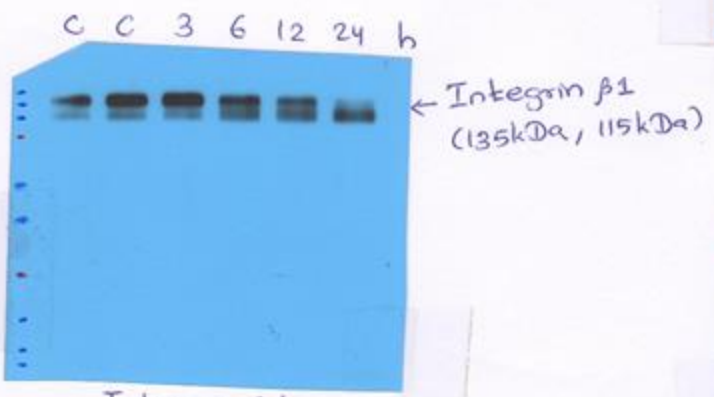

Integrin  $\beta 1$

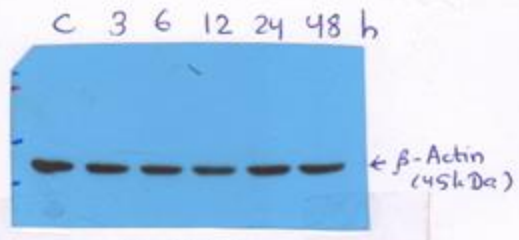

$\beta$ -Actin

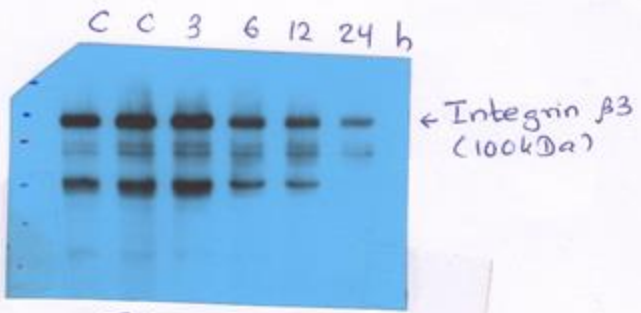

Integrin  $\beta 3$

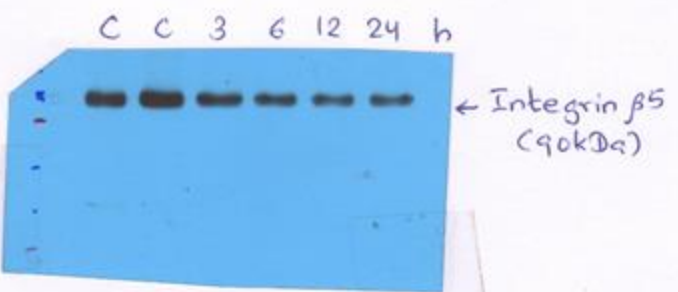

Integrin  $\beta 5$

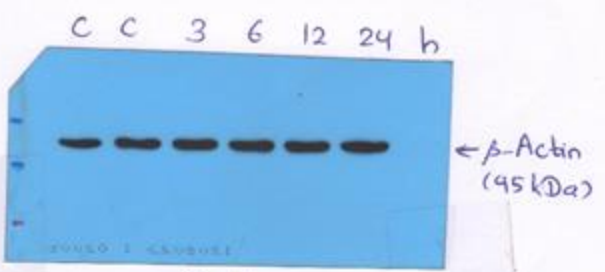

$\beta$ -Actin

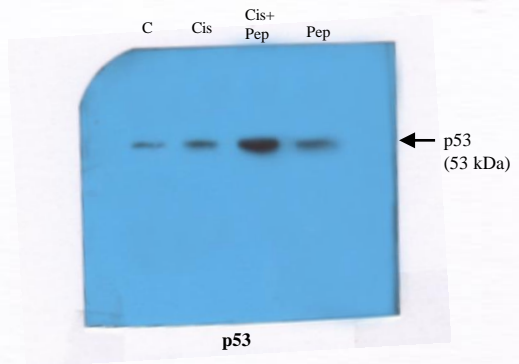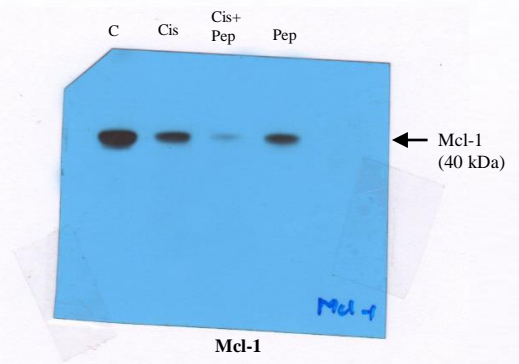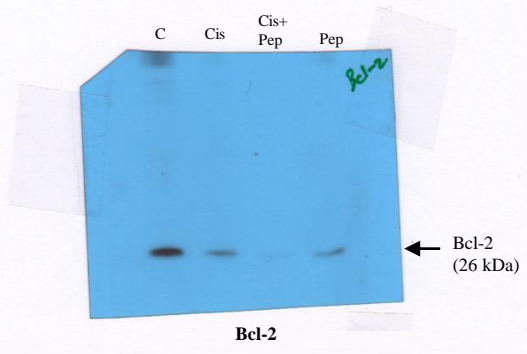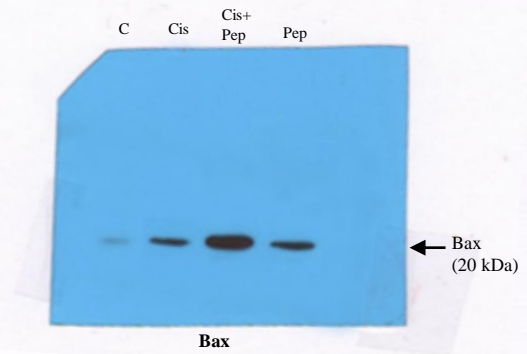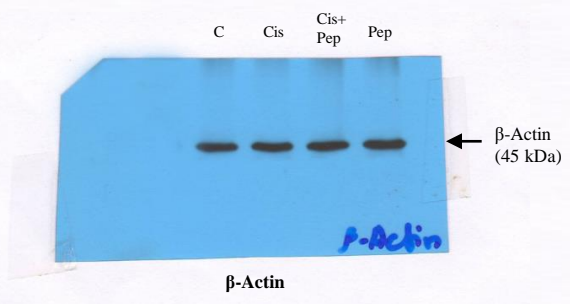

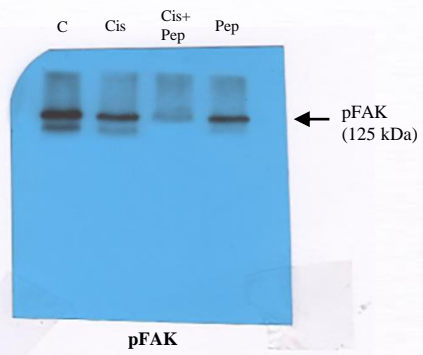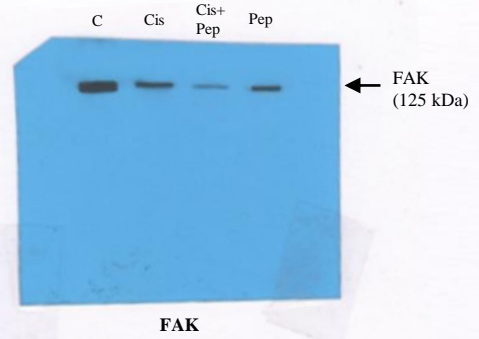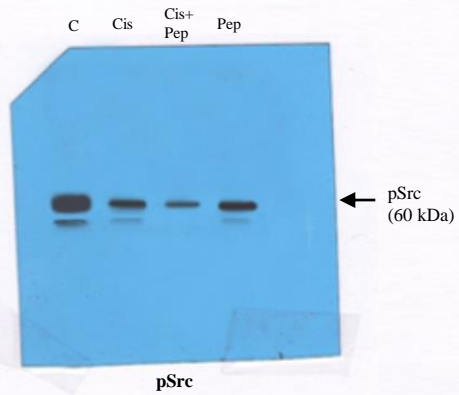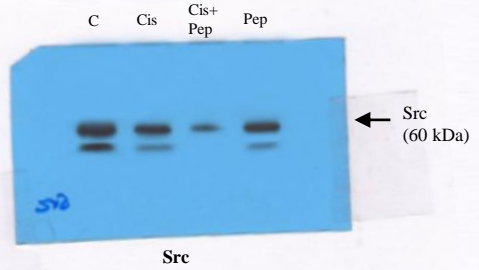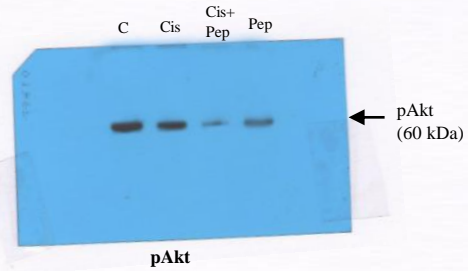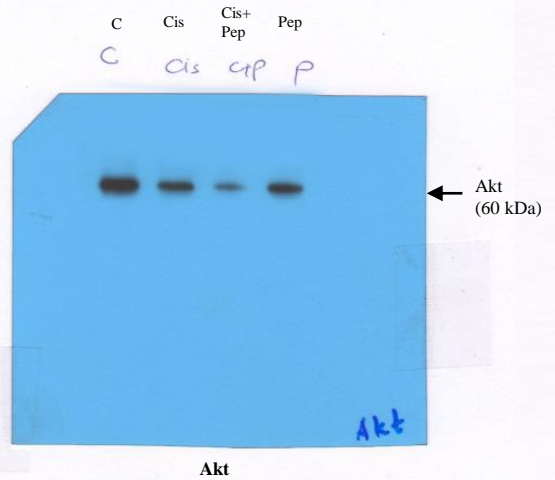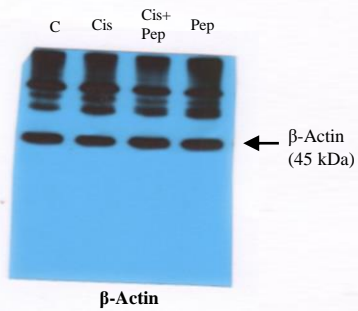

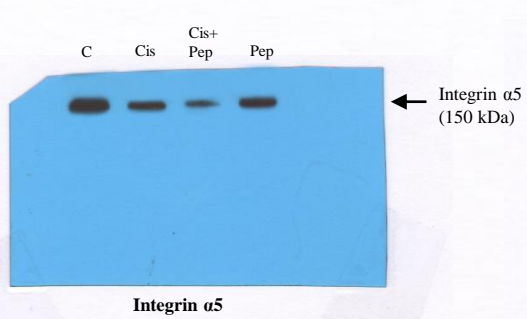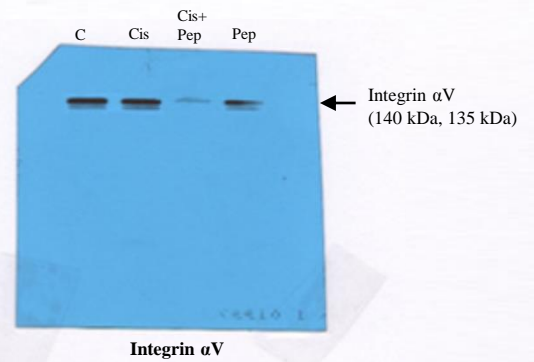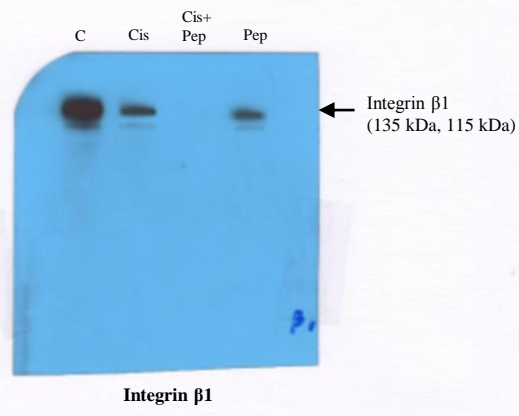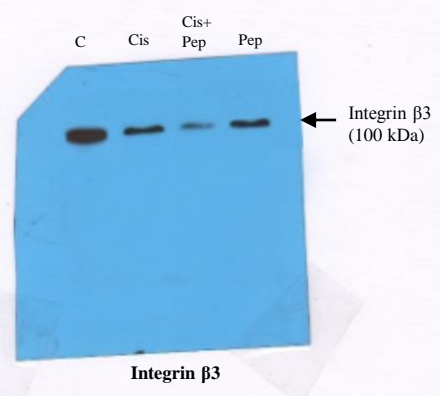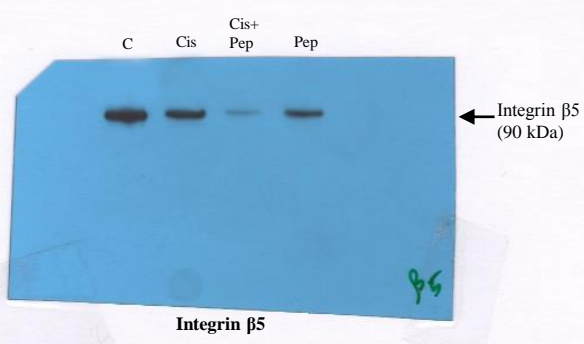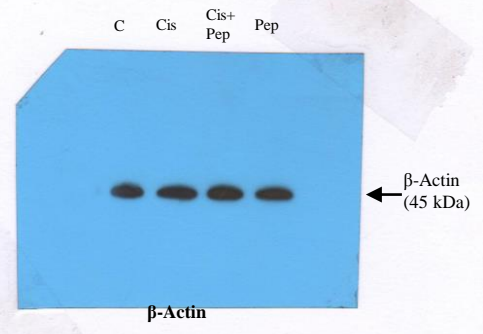

Supplement: 41598_2021_83606_MOESM1_ESM.pdf [file 41598_2021_83606_MOESM1_ESM.pdf]
